# Capturing multiple timescales of adaptation to second-order statistics with generalized linear models: gain scaling and fractional differentiation

**Authors:** Kenneth W. Latimer<sup>1,\*</sup> and Adrienne L. Fairhall<sup>2</sup>

<sup>1</sup>Department of Neurobiology, University of Chicago, Chicago, IL, USA

<sup>2</sup>Department of Physiology & Biophysics, University of Washington, Seattle, WA, USA

\* Corresponding Author: [latimerk@uchicago.edu](mailto:latimerk@uchicago.edu)

December 30, 2019

## Abstract

Single neurons can dynamically change the gain of their spiking responses to account for shifts in stimulus variance. Moreover, gain adaptation can occur across multiple timescales. Here, we examine the ability of a simple statistical model of spike trains, the generalized linear model (GLM), to account for these adaptive effects. The GLM describes spiking as a Poisson process whose rate depends on a linear combination of the stimulus and recent spike history. The GLM successfully replicates gain scaling observed in Hodgkin-Huxley simulations of cortical neurons that occurs when the ratio of spike-generating potassium and sodium conductances approaches one. Gain scaling in the GLM depends on the length and shape of the spike history filter. Additionally, the GLM captures adaptation that occurs over multiple timescales as a fractional derivative of the stimulus variance, which has been observed in neurons that include long timescale afterhyperpolarization conductances. Fractional differentiation in GLMs requires long spike history that span several seconds. Together, these results demonstrate that the GLM provides a tractable statistical approach for examining single-neuron adaptive computations in response to changes in stimulus variance.

## 1 Introduction

Neurons adapt their spiking responses in a number of ways to the statistics of their inputs (Fairhall, 2014). A particularly well-studied example is adaptation to the stimulus variance, which can provide important computational properties. First, neurons can show gain scaling, such that the input is scaled by the stimulus standard deviation (Fairhall et al., 2001a; Mease et al., 2013). Scaling of the gain by the stimulus standard deviation implies that single spikes maintain the same information about the stimulus independent of its overall amplitude. This adaptation of the “input gain” with stimulus standard deviation can occur very rapidly. Second, the mean firing rate can adapt to variations in the stimulus variance across multiple timescales (Fairhall et al., 2001b; Wark et al., 2007). This form of spike frequency adaptation can in some cases have power-law properties (Pozzorini et al., 2013) and serve to compute the fractional derivative of the variance (Anastasio, 1998; Lundstrom et al., 2008).

31 One approach to studying such adaptation is to use Hodgkin-Huxley style (HH) conductance based  
 32 models to explore potential single-neuron mechanisms underlying these computations (Lundstrom  
 33 et al., 2008; Mease et al., 2013). Although HH models can indeed capture such behavior, the mecha-  
 34 nistic HH framework is not ideally suited for statistical analysis of spike train data in sensory systems as  
 35 HH model parameters are difficult to interpret in terms of computation and coding. Moreover, fitting HH  
 36 models to intracellular data is difficult (Buhry et al., 2011; Csercsik et al., 2012; Vavoulis et al., 2012;  
 37 Lankarany et al., 2014), and only recently methods that fit HH models to spike trains alone have been  
 38 gaining success (Meng et al., 2011, 2014).

39 In contrast, statistical point process models based on the generalized linear model (GLM) framework  
 40 have provided a tractable tool for modeling spiking responses of neurons in sensory systems (Truccolo  
 41 et al., 2005; Pillow et al., 2008). Previous work has shown the utility of finding linear features that can  
 42 explain the spiking behavior of HH models (Agüera y Arcas et al., 2003; Agüera y Arcas and Fairhall,  
 43 2003; Weber and Pillow, 2017). Unlike simple linear/nonlinear models, GLMs also incorporate a depen-  
 44 dence on the history of activity, potentially providing a helpful interpretative framework for adaptation  
 45 (Mease et al., 2014). We therefore fit GLMs to spike trains generated from a range of HH neurons.  
 46 We found that the GLMs could reproduce the single-neuron adaptive computations of gain scaling and  
 47 fractional differentiation. Capturing gain scaling across a range of HH active conductance parameters  
 48 depended both on the choice of link function and spike history length. As the length of the spike history  
 49 filter increased, the stimulus dependency of neurons changed from differentiating to integrating (Steven-  
 50 son, 2018). Capturing adaptation as a fractional derivative required a history filter that could account for  
 51 long timescale effects: on the order of 10 s. Together these results demonstrate that the GLM provides  
 52 a tractable statistical framework for modeling adaptation that occurs at the single-neuron level.

## 53 2 Materials and Methods

### 54 2.1 Gain scaling

55 Gain scaling refers to the case when for an input-output function of a neuron, the input gain is propor-  
 56 tional to the standard deviation (SD) of the stimulus ( $\sigma$ ). Thus, the gain depends on the recent context.  
 57 If a neuron achieves perfect gain scaling, the firing rate  $R$  given a particular stimulus value,  $s$ , and input  
 58 standard deviation can be written as:

$$R_{\sigma}(s) = \bar{R}_{\sigma} \hat{R} \left( \frac{s}{\sigma} \right) \quad (1)$$

59 where the normalized stimulus  $\hat{s} = \frac{s}{\sigma}$ , and the output gain,  $\bar{R}_{\sigma}$ , is constant in  $s$ .

60 To quantify the degree of gain scaling in a neuron's spiking output, we measure the firing rate function  
 61 in response to a white-noise input,  $x(t)$ , at different SDs and constant mean  $\mu$  (**Figure 1A**). For each  
 62 standard deviation, we compute the normalized spike-triggered average (STA; **Figure 1B**) (Rieke et al.,  
 63 1999). We then compute the stimulus as the convolution  $s(t) = \int_0^t \text{STA}(t')(x(t-t') - \mu) dt'$ . The spike  
 64 rate function is then defined probabilistically as

$$R_{\sigma}(s) \Delta t = p_{\sigma}(\text{spk} | \hat{s}) = \frac{p_{\sigma}(\hat{s} | \text{spk})}{p_{\sigma}(\hat{s})} p_{\sigma}(\text{spk}) \quad (2)$$

65 where the right side follows from Bayes' rule. The average firing rate in time bin of width  $\Delta_t$  is  $p_\sigma(\text{spk})$ .  
 66 Thus, we get  $\bar{R}_\sigma \Delta_t = p_\sigma(\text{spk})$  and  $\hat{R}\left(\frac{s}{\sigma}\right) = \frac{p_\sigma(\hat{s}|\text{spk})}{p_\sigma(\hat{s})}$ . The spike-triggered stimulus distribution,  
 67  $p_\sigma(\hat{s}|\text{spk})$ , is the probability of the stimulus given that a spike occurred in the bin. By definition the  
 68 marginal stimulus distribution,  $p_\sigma(\hat{s})$ , is a standard normal distribution which does not depend on  $\sigma$ .  
 69 Therefore, if  $p_\sigma(\hat{s}|\text{spk})$  is similar across different values of  $\sigma$ , gain scaling is achieved because  $\hat{R}(\hat{s})$   
 70 does not depend on  $\sigma$ .

71 We measure gain scaling in terms of the spike-triggered distribution. We do so using the 1st Wasser-  
 72 stein, or earth-mover's metric (we obtained qualitatively similar results using the symmetrized Kullback-  
 73 Leibler divergence and Jensen-Shannon divergence). The Wasserstein metric is a distance function  
 74 between two probability distributions. Intuitively, it can be thought of as the minimum work needed to  
 75 transform one distribution into the other by moving probability mass as if the distributions are piles of  
 76 sand (**Supplementary Figure 1**). Formally, it is defined as

$$W_1(\mu, \nu) = \inf_{\gamma \in \Gamma(\mu, \nu)} \int_{M \times M} d(x, y) d\gamma(x, y) \quad (3)$$

77 where  $\nu$  and  $\mu$  are probability measures on a metric space  $M$  with metric  $d(\cdot, \cdot)$ . The infimum is taken  
 78 over the collection of measures,  $\Gamma(\mu, \nu)$ , on  $M \times M$  with  $\mu$  and  $\nu$  marginal distributions. We compute  
 79 the gain scaling score at  $\sigma$  as  $D_\sigma = W_1(p_1(\hat{s}|\text{spk}), p_\sigma(\hat{s}|\text{spk}))$ . A distance close to 0 indicates that the  
 80 spike-triggered distributions are similar, and therefore the cell is gain scaling its input (**Figure 1C-D**).  
 81 Larger values of  $D_\sigma$  indicate that the input-output function does not scale with  $\sigma$  (**Figure 1F-G**). We  
 82 computed the spike-triggered distribution using a histogram with bins of width 0.1.

### 83 2.1.1 Gain scaling in Hodgkin-Huxley neurons

84 A previous study by Mease et al. (2013) found that Hodgkin-Huxley models could account for gain  
 85 scaling observed in pyramidal neurons. Thus we simulated spikes from single-compartment Hodgkin-  
 86 Huxley style models of pyramidal neurons, providing a source of data with which to explore the expres-  
 87 sion of this property using GLMs. The voltage and gating dynamics followed the equations (Mainen  
 88 et al., 1995)

$$C \frac{dV}{dt} = I_{stim}(t) - G_{Na} m^3 h (V - E_{Na}) - G_K n (V - E_K) - G_L (V - E_L) \quad (4)$$

89 such that for each gate  $x \in \{n, m, h\}$

$$\tau_x(V) \frac{dx}{dt} = x_\infty(V) - x, \quad \tau_x(V) = \frac{1}{\alpha_x(V) + \beta_x(V)} \quad (5)$$

$$n_\infty(V) = \alpha_n(V) \tau_n(V), \quad m_\infty(V) = \alpha_m(V) \tau_m(V), \quad h_\infty(V) = \frac{1}{1 + \exp\left(\frac{V+65}{6.2}\right)} \quad (6)$$

$$\alpha_n(V) = \frac{20(V-20)}{1 - \exp\left(-\frac{V-20}{9}\right)}, \quad \beta_n(V) = \frac{-2(V-20)}{1 - \exp\left(\frac{V-20}{9}\right)} \quad (7)$$

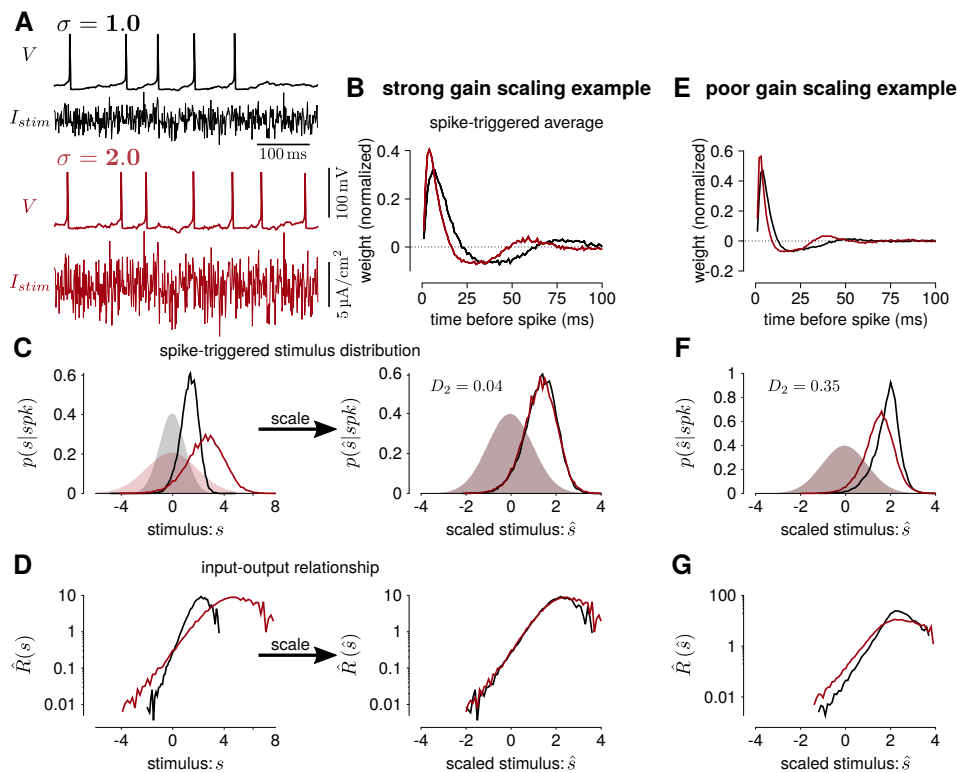

Figure 1: (A) Hodgkin-Huxley simulation of a neuron stimulated with white noise at two different standard deviation levels (black  $\sigma = 1$ ; red  $\sigma = 2$ ). In this simulation, the total sodium and potassium conductances were equal ( $G_{Na} = G_K = 1000 \text{ pS}/\mu\text{m}^2$ ). (B) The STAs measured at the two stimulus standard deviations. (C) Left shows the spike-triggered distributions of the STA filtered input ( $s$ ) and right shows the distributions over the STA filtered input scaled by the standard deviation ( $\hat{s}$ ). The shaded areas show the prior stimulus distributions, which are Gaussian distributed with standard deviation  $\sigma$ . (D) The input-output functions of the stimulation at each stimulus level. Scaling the input by the standard deviation shows that the simulated neuron scales the gain of the input by the stimulus standard deviation (right). (E) The STAs measured at two standard deviations from a Hodgkin-Huxley simulation with high potassium and low sodium total conductances ( $G_{Na} = 600$  and  $G_K = 2000 \text{ pS}/\mu\text{m}^2$ ). The spike-triggered stimulus distribution (F) and scaled input-output function (G) for this simulation does not show gain scaling.

$$\alpha_m(V) = \frac{182(V + 35)}{1 - \exp\left(-\frac{V+35}{9}\right)} \quad \beta_m(V) = \frac{-124(V + 35)}{1 - \exp\left(\frac{V+35}{9}\right)}$$

$$\alpha_h(V) = \frac{24(V + 50)}{1 - \exp\left(-\frac{V+50}{5}\right)} \quad \beta_h(V) = \frac{-9.1(V + 75)}{1 - \exp\left(\frac{V+75}{5}\right)}$$

90 The reversal potentials were  $E_{Na} = -70$ ,  $E_K = 50$ , and  $E_L = -70$  mV and the capacitance was

91  $C = 1 \mu\text{F}/\text{cm}^2$ . The leak conductance was set to  $0.4 \text{ pS}/\mu\text{m}^2$  so that the resting membrane had a  
92 time constant of approximately 25 ms. As in Mease et al. (2013), we explored a range of values for the  
93 active conductances  $G_{Na}$  and  $G_K$ : from  $600\text{-}2000 \text{ pS}/\mu\text{m}^2$  in increments of  $100 \text{ pS}/\mu\text{m}^2$ . Simulations  
94 were performed in MATLAB using a fourth-order Runge-Kutta method with step size 0.01 ms. Spike  
95 times were defined as upward crossings of the voltage trace at  $-10 \text{ mV}$  separated by at least 2 ms.  
96 The input consisted of Gaussian draws every 1 ms with parameters  $\mathcal{N}(\mu, (4\mu\sigma)^2)$  where  $\sigma$  was set to  
97 1.0, 1.3, 1.6 or 2.0. For each value of  $G_{Na}$  and  $G_K$ , the mean input,  $\mu$ , was tuned so that at baseline,  
98 where  $\sigma = 1$ , each simulation produced approximately 10 spk/s using a 100 s simulation. We did not  
99 consider values of  $G_{Na}$  and  $G_K$  that spiked spontaneously (i.e., spiked when  $\mu = 0$ ). We simulated  
100 2000 s of spiking activity at each stimulus level (generating approximately 20000 spikes at  $\sigma = 1$ ).

## 101 2.2 Fractional differentiation

102 We next looked at periodic modulations of the stimulus standard deviation to model long timescale adap-  
103 tive effects. We applied stimuli consisting of Gaussian noise with sinusoidal or square wave modulation  
104 of the variance between 1 and  $\sigma$  with  $\sigma$  again taking values of 1.3, 1.6 or 2.0, at a number of different  
105 frequencies. We analyzed simulated spike trains across 7 noise modulations periods: 1, 2, 4, 8, 16, 32,  
106 and 64 s. The simulations were 3200 s for each period, giving a minimum of 50 cycles per period.

107 Lundstrom et al. (2008) found that pyramidal neurons can act as fractional differentiators of the stimulus  
108 amplitude envelope for this type of input. Fractional derivatives generalize the derivative operator such  
109 that, analogous to taking the first derivative of a function twice to obtain the second derivative, taking the  
110 fractional derivative of order  $\alpha = 1/2$  twice results in the first derivative (Oldham and Spanier, 1974).  
111 Fractional differential filters respond to a square stimulus as an exponential-like decay with a time  
112 constant that depends on  $\alpha$  (**Figure 2A-B**). Fractionally differentiating a sinusoidal stimulus produces a  
113 *frequency dependent gain change* (**Figure 2C**)

$$\text{gain} \propto f^\alpha \quad (8)$$

114 where  $f$  is the frequency. Additionally, fractionally differentiating the sine function gives a *frequency*  
115 *independent phase shift*,  $\phi$ , of the stimulus (**Figure 2D**):

$$\phi = \alpha \frac{\pi}{2}. \quad (9)$$

116 These three measures can be combined to estimate approximate fractional differentiation by neurons.  
117 To compute the fractional derivative order, we computed cycle-averaged responses obtained using 30  
118 bins per cycle at each stimulus amplitude modulation frequency. We fit the cycle-averaged square-wave  
119 responses across all modulation frequencies as the best fitting fractional derivative of the stimulus am-  
120 plitude (plus a baseline rate) using least-squares. To fit  $\alpha$  to the phase lead of the sine-wave responses,  
121 we computed mean phase lead ( $\phi$ ) across frequencies and applied Equation 9. To fit  $\alpha$  to the gain of  
122 the sine-wave responses, we applied Equation 8 by fitting a least-squares regression between the fre-  
123 quency of modulation and the logarithm of the gain.

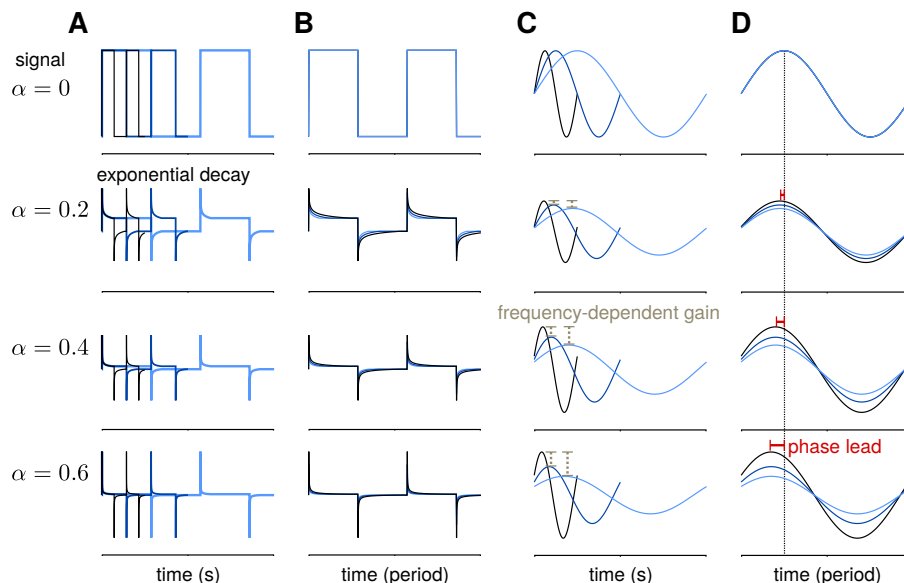

Figure 2: Example of a fractional derivative of several orders. Each row shows a different fractional order ( $\alpha$ ) of the function in the top row. **(A)** The fractional derivatives of a step function with three different periods (colors) shows exponential filtering with an  $\alpha$  dependent timescale. **(B)** The fractional derivatives in A scaled by period. **(C)** The fractional derivatives of a sine function for three different periods. As  $\alpha$  increases, the fractional derivative shows greater frequency-dependent gain. **(D)** The same function as in **B** with the sine functions scaled by period. At higher orders, the phase lead of the fractional derivative relative to the signal increases equally over frequencies.

## 124 2.2.1 Fractional differentiation by Hodgkin-Huxley neurons

125 We simulated neurons from the standard HH model with three additional afterhyperpolarization (AHP)  
126 currents with time constants ranging from 0.3 to 6 s. The equations for the HH neurons were

$$C \frac{dV}{dt} = I_{stim}(t) - G_{Na} m^3 h (V - E_{Na}) - G_K n^4 (V - E_K) - G_L (V - E_L) - \sum_{i=1}^3 G_{AHP,i} a_i (V - E_{AHP}) \quad (10)$$

127 The gates  $x \in n, m, h$  follow the dynamics

$$\tau_x(V) \frac{dn}{dt} = x_\infty(V) - x, \quad \tau_x(V) = \frac{1}{\alpha_x(V) + \beta_x(V)}, \quad x_\infty(V) = \alpha_x(V) \tau_x(V) \quad (11)$$

128

$$\alpha_n(V) = \frac{0.01(V + 55)}{1 - \exp(-0.1(V + 55))}, \quad \beta_n(V) = 0.125 \exp(-(V + 65)/80) \quad (12)$$

$$\alpha_m(V) = \frac{0.1(V + 40)}{1 - \exp(-0.1(V + 40))}, \quad \beta_m(V) = 4 \exp(-(V + 65)/18)$$

$$\alpha_h(V) = 0.07 \exp(-(V + 65)/20), \quad \beta_h(V) = \frac{1}{1 + \exp(-0.1(V + 35))}.$$

129 The AHP currents have linear dynamics and are incremented by 1 at spike times ( $t_{spk,i}$ ):

$$\frac{da_i}{dt} = -\frac{a_i}{\tau_i} + \sum_i \delta(t - t_{spk,i}) \quad (13)$$

130 where  $\delta$  is the Dirac delta function. The standard were:  $G_{Na} = 120$ ,  $G_K = 36$ ,  $G_L = 0.3$  mS/cm<sup>2</sup>;  
 131  $E_{Na} = 50$ ,  $E_K = -77$ ,  $E_L = -54.4$  mV; and  $C = 1$   $\mu$ F/cm<sup>2</sup>. The AHP conductances were set  
 132 relative to the leak conductance:  $G_{AHP,i} = (0.05, 0.006 \text{ and } 0.004)G_L$ . The AHP reversal potential was  
 133  $E_{AHP} = -100$  mV and the AHP timescales were set to  $\tau_i = (0.3, 1, \text{ and } 6)$ s.

134 Similarly to the gain scaling simulations, the stimulus was sampled independently in each 1 ms bin  
 135 from a normal distribution with mean  $\mu$ . The time-dependent variance given  $\sigma$  and the period ( $p$ ) was  
 136  $4\mu f_p(t, \sigma)$ . The time-dependent modulation function for the square-wave stimulus was

$$f_p(t, \sigma) = 1 + (\sigma - 1) \left[ \frac{1}{2} \sin\left(\frac{2t\pi}{p}\right) + 1 \right] \quad (14)$$

138 where  $\lfloor \cdot \rfloor$  denotes the floor operator, and the function for the sine-wave stimulus was similarly defined  
 139 as

$$f_p(t, \sigma) = 1 + (\sigma - 1) \left( \frac{1}{2} \sin\left(\frac{2t\pi}{p}\right) + \frac{1}{2} \right). \quad (15)$$

141 The parameter  $\mu$  was calibrated so that with no variance modulation (i.e.,  $\sigma = 1$ ), the simulated cells  
 142 produced approximately 10 spk/s.

### 143 2.3 Generalized linear models

144 The GLM models the spiking process as an autoregressive Poisson process with (**Figure 3A**). The  
 145 spike rate at time  $t$  is given as a linear-nonlinear function of the stimulus and the spike history

$$\lambda_t = f\left(\mathbf{k}_{stim}^\top \mathbf{x}_t + \mathbf{h}_{spk}^\top \mathbf{y}_{hist,t} + b\right) \quad (16)$$

146 where  $\mathbf{x}_t$  is the stimulus vector preceding time  $t$ , and  $\mathbf{y}_{hist}$  is the spike history vector. The parameters  
 147 of the GLM are the stimulus filter ( $\mathbf{k}_{stim}$ ), the spike history filter ( $\mathbf{h}_{spk}$ ), and baseline rate ( $b$ ). For the  
 148 inverse-link function,  $f$ , we used the canonical exponential function except where otherwise noted.

149 The log-likelihood of a binned spike train,  $\mathbf{y}$ , given the model parameters is then

$$\log p(\mathbf{y} | \mathbf{k}_{stim}, \mathbf{h}_{spk}, b) = \sum_{t=1}^T -\lambda_t \Delta_t + y_t \log(\lambda_t) + const. \quad (17)$$

150 For all model fits and simulations, we set  $\Delta_t = 1$  ms. We numerically maximized the log-likelihood  
 151 using conjugate-gradient methods.

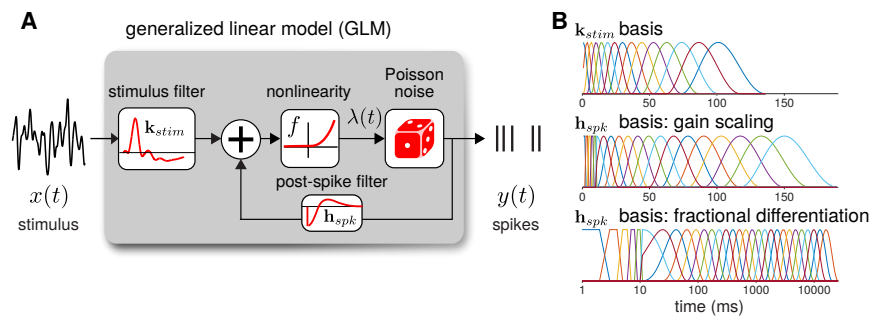

Figure 3: **(A)** Diagram of the neural GLM that describes spiking as an autoregressive Poisson process. **(B)** The basis functions used to parameterize the GLM filters. (top) The stimulus basis used for all GLMs. (middle) The spike history basis used for the gain scaling simulations. (bottom) The spike history basis used for the fractional differentiation simulations. Due to the length of the spike history filters needed to capture fractional differentiation, the time axis is shown in log scale.

152 To reduce the number of model parameters, we parameterized the  $S$  filters using smooth basis functions  
 153 **(Figure 3B)**. The stimulus filter was parameterized using 15 raised cosine basis functions:

$$\mathbf{b}_j(t) = \begin{cases} \frac{1}{2} \cos\left(\frac{\log[t+c]-\phi_j}{a}\right) + \frac{1}{2} & \text{for } \frac{\log[t+c]-\phi_j}{a} \in [-\pi, \pi] \\ 0 & \text{otherwise} \end{cases} \quad (18)$$

154 where  $t$  is in seconds. We set  $c = 0.02$  and  $a = 2(\phi_2 - \phi_1)/\pi$ . The  $\phi_j$  were evenly spaced from  
 155  $\phi_1 = \log(T_0/1000 + c)$ ,  $\phi_{15} = \log(T_{end}/1000 + c)$  where the peaks of the filters are in the range  $T_0 = 0$   
 156 and  $T_{end} = 100$  ms.

157 The spike history filter bases were constructed in two parts. To account for the absolute refractory  
 158 period, we used 5 box car filters of width 2 ms for the first 10 ms of the spike history. The remaining  
 159 spike history filter was parameterized using raised cosine basis functions with the parameter  $c = 0.05$ .  
 160 For the gain scaling simulations,  $N = 15$  cosine basis functions were used with spacing  $T_0 = 10$  and  
 161  $T_{end} = 150$  ms. For the fractional differentiation simulations,  $N = 25$  cosine basis functions were used  
 162 with spacing  $T_0 = 10$  and  $T_{end} = 16000$  ms. To explore how the timescale of spike history affected  
 163 adaptation in the GLM, for each model we fit the GLM using only the first  $i$  cosine basis functions for  
 164 each  $i = 0$  (using only the refractory box-car functions) to  $i = N$ . Thus, we obtained  $N + 1$  nested  
 165 model fits across a range of spike history lengths. When stated, the length of the spike history filter,  
 166  $T_{hist,i}$ , denotes the time of the peak of the  $i$ th basis function.

### 167 2.3.1 Evaluating model performance

168 We evaluated the GLM performance by assessing the ability of the GLM to predict the HH model  
 169 response to a 32 s novel stimulus. For the gain scaling simulations, we tested the response to the test  
 170 stimulus at each stimulus SD ( $\sigma$ ). For the fractional differentiation simulations, the stimulus SD was  
 171 modulated by a sine or square wave with a 4 s period and a modulation height of  $\sigma = 2.0$ . Predictive  
 172 performance was evaluated using the pseudo- $R^2$  score (Cameron and Windmeijer, 1997). We selected



173 this measure because it can be applied to Poisson process observations instead of trial-averaged firing  
 174 rates as is required by the standard  $R^2$  measure of explained variance (Benjamin et al., 2018). Thus, it is  
 175 especially appropriate for comparing the stochastic GLM to a spike train simulated by the deterministic  
 176 HH model. The pseudo- $R^2$  is written as the ratio of deviances:

$$\begin{aligned} \text{pseudo-}R^2 &= 1 - \frac{D(\mathbf{y}^*, \text{GLM})}{D(\mathbf{y}^*, \text{null})} \\ &= 1 - \frac{\log(p_{\text{GLM}}(\mathbf{y}^* | \mathbf{k}_{stim}, \mathbf{h}_{spk}, b)) - \log(p_{\text{sat.}}(\mathbf{y}^*))}{\log(p_{\text{null}}(\mathbf{y}^* | \bar{\mathbf{y}}^*)) - \log(p_{\text{sat.}}(\mathbf{y}^*))} \end{aligned} \quad (19)$$

177 where  $\mathbf{y}^*$  is the test spike train. The GLM likelihood is  $p_{\text{GLM}}(\mathbf{y}^* | \mathbf{k}_{stim}, \mathbf{h}_{spk}, b)$  and the likelihood of  
 178 the null model ( $p_{\text{null}}(\mathbf{y}^* | \bar{\mathbf{y}}^*)$ ) is the probability of the spike train given only the mean firing rate,  $\bar{\mathbf{y}}^*$ . The  
 179 saturated model likelihood ( $p_{\text{sat.}}(\mathbf{y}^*)$ ) is the probability of observing  $\mathbf{y}^*$  given one parameter per bin:  
 180 that is, the Poisson probability observing  $\mathbf{y}^*$  given a model with rate  $\lambda = 1$  in each bin in which the HH  
 181 model spiked and rate  $\lambda = 0$  in each bin that the HH did not spike. Thus, the pseudo- $R^2$  measures the  
 182 fraction of explainable log-likelihood captured by the GLM.

## 183 3 Results

### 184 3.1 GLMs capture gain scaling behavior

185 To investigate how GLMs can capture biophysically realistic gain scaling, we fit the Hodgkin-Huxley  
 186 simulations with GLMs (**Figure 4A**). We fit a unique GLM for each value of  $G_{Na}$  and  $G_K$  in the HH  
 187 model, and the GLMs were fit using the entire range of stimulus SDs ( $\sigma = 1.0, 1.3, 1.6,$  and  $2.0$ ).  
 188 Applying the STA analysis at the four stimulus SDs, we quantified gain scaling in GLM fits and compared  
 189 the gain scaling in the GLM simulations to the HH neurons (**Figure 4B-C**). Across the range of spiking  
 190 conductance values, we found that the GLM fits consistently showed gain scaling (**Figure 4D**). The HH  
 191 neurons showed the greatest degree of gain scaling when the  $G_{Na}/G_K$  ratio was close to one, with the  
 192 lowest  $D_2$  score occurring at a ratio of 1.17 (Mease et al., 2013). We observed the same pattern in the  
 193 GLM simulations, but the GLM fits generally exhibited stronger gain scaling when  $G_{Na}/G_K < 1$  than  
 194 the HH neurons.

195 The GLM's characterization of the HH neurons depended on the spike history filter. This is revealed by  
 196 comparing the stimulus filters (**Figure 4A**) to the stimulus features extracted by spike-triggered averag-  
 197 ing (**Figure 4B**): While the STA showed multiphasic responses, the GLM stimulus filter was consistent  
 198 with a simple, monophasic integration. This demonstrates that the STA reflects the combination of  
 199 stimulus and spike history effects (Stevenson, 2018; Agüera y Arcas and Fairhall, 2003). A spike his-  
 200 tory filter of sufficient length was necessary to achieve accurate model fits across all stimulus SDs  
 201 (**Figure 5A,B**).

202 We also explored how the stimulus conditions used to fit the GLM determined the model's ability to  
 203 capture gain scaling. Remarkably, we found that the GLM fit only to the baseline stimulus SD ( $\sigma = 1.0$ )  
 204 captured the gain scaling pattern seen in the HH neuron (**Figure 5B**). The gain scaling observed in the  
 205 GLMs required a sufficiently long spike history filter, on the order of at least 50 ms. With shorter spike  
 206 history, the GLM did not obtain the same level of gain scaling performance at the optimal  $G_{Na}/G_K$  ratio.

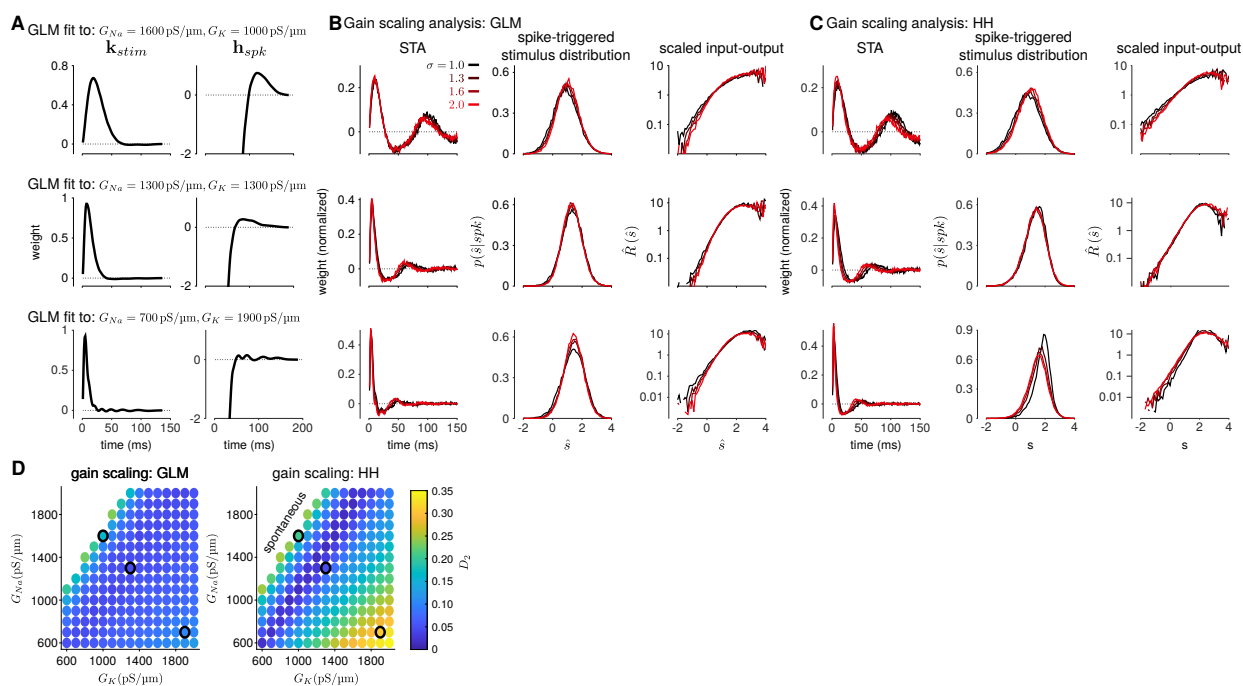

Figure 4: **(A)** Example filters from GLM fits to HH simulations with three different spiking conductance levels (rows). Large negative values driving the refractory period in the spike history filter (right) have been truncated. **(B)** The spike-triggered averages (left), scaled spike-triggered stimulus distributions (right), and scaled input-output functions (right) for the GLM fits in A for all four stimulus SDs. **(C)** Same as B for the HH simulations. **(D)** Gain scaling performance (Wasserstein distance between the spike-triggered distributions at  $\sigma = 1$  and  $\sigma = 2$ ) at all the spiking conductance levels explored for the GLM simulations (top) and the Hodgkin-Huxley simulations (bottom). Lower values of  $D_2$  correspond to stronger gain scaling. The three black circles indicate the conductance levels for the GLM examples in A and B. Gain scaling was not computed for values of  $G_{Na}$  and  $G_K$  that resulted in spontaneous spiking in the Hodgkin-Huxley simulations.

207 However, these GLM fits failed to generalize across stimulus SDs. The GLM trained only at  $\sigma = 1.0$   
 208 explained less variance in the spiking responses to a stimulus at  $\sigma = 2.0$  than a model capturing only  
 209 the mean firing rate for all values of  $G_{Na}$  and  $G_K$  (predictive pseudo- $R^2$  less than 0; **Figure 5C**).  
 210 Therefore, the GLM trained at  $\sigma = 1.0$  does not accurately characterize the HH responses despite  
 211 accurately predicting gain scaling in those cells. In contrast, GLMs trained at all four  $\sigma$  values failed  
 212 to capture the lack of gain scaling at low  $G_{Na}/G_K$  values despite showing improved model fit across  
 213 all  $\sigma$  (**Figure 5D**; a detailed example is provided in **Supplementary Figure 2A**). Because the GLM  
 214 trained on all  $\sigma$  showed both consistent generalization performance and strong gain scaling behavior,  
 215 the remaining analyses considered only that training condition.

216 We next considered how the GLM parameters related to the gain scaling computation and the space  
 217 of  $G_{Na}$  and  $G_K$  in the HH models. To visualize the geometry of the model parameters, we performed  
 218 PCA on the stimulus and spike history filters (**Figure 6A,E**). The filters produced across the two HH

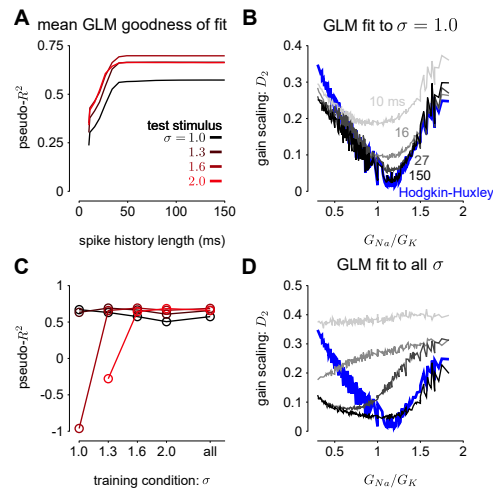

Figure 5: **(A)** The pseudo- $R^2$  of the GLM fits at the four different stimulus SDs averaged over all  $G_{Na}$  and  $G_K$  as a function of spike history length. The GLMs were trained at all stimulus conditions. **(B)** Gain scaling in the Hodgkin-Huxley simulations (blue) measured as a function of the sodium-potassium conductance ratio ( $G_{Na}/G_K$ ). The gray traces show gain scaling measured in the GLMs fit to the HH simulations for four different spike history filter length. The GLMs were trained using HH simulations with the stimulus at the baseline SD ( $\sigma = 1.0$ ). **(C)** The average pseudo- $R^2$  measured for each  $\sigma$  for the GLMs given each training stimulus condition. **(D)** Same as B for the GLMs fit only using all four values  $\sigma$ .

219 parameters spanned a two-dimensional subspace (variance explained: stimulus 98.8%, spike history  
 220 97.3%). The PCA reconstructions for example stimulus filters are given in **Supplementary Figure 3**.  
 221 However, the PCs do not correspond to a linear mapping of the  $G_{Na}$  and  $G_K$  axes (**Figure 6B,F**).  
 222 Instead, the first component for both filters correlated with the  $G_{Na}/G_K$  ratio (**Figure 6C,G**; stimulus  
 223 PC1  $r = -0.97, p < 10^{-4}$ ; spike history PC2  $r = 0.97, p < 10^{-4}$ ). The second correlates with the gain  
 224 scaling value observed in the corresponding HH model (**Figure 6D,H**; stimulus PC2  $r = -0.89, p <$   
 225  $10^{-4}$ ; spike history PC2  $r = 0.90, p < 10^{-4}$ ). Thus, the GLM parameterizes the HH neuron in a space  
 226 that corresponds to the ratio  $G_{Na}/G_K$  and gain scaling factor.

### 227 3.1.1 Power-law firing rate nonlinearities

228 The GLMs we considered used the canonical inverse-link function, the exponential nonlinearity (McCul-  
 229 lagh and Nelder, 1989), to transform the filtered stimulus plus spike history into a firing rate. However,  
 230 it is known that firing rate nonlinearities that instead have a power-law relationship of the input produce  
 231 gain scaling (Miller and Troyer, 2002; Murphy and Miller, 2003). We therefore considered a range of  
 232 soft-power nonlinearities over a range of exponents for the GLM firing rate (**Figure 7A**; Equation 16):

$$f(x) = \log(1 + \exp(x))^p \quad (20)$$

233 for  $p \in \{2, 3, 4, 5\}$  (for  $p = 1$ , the model performed poorly for all HH simulations and the results are not  
 234 shown). We found that the power-law nonlinearity produced better predictive fit than the exponential

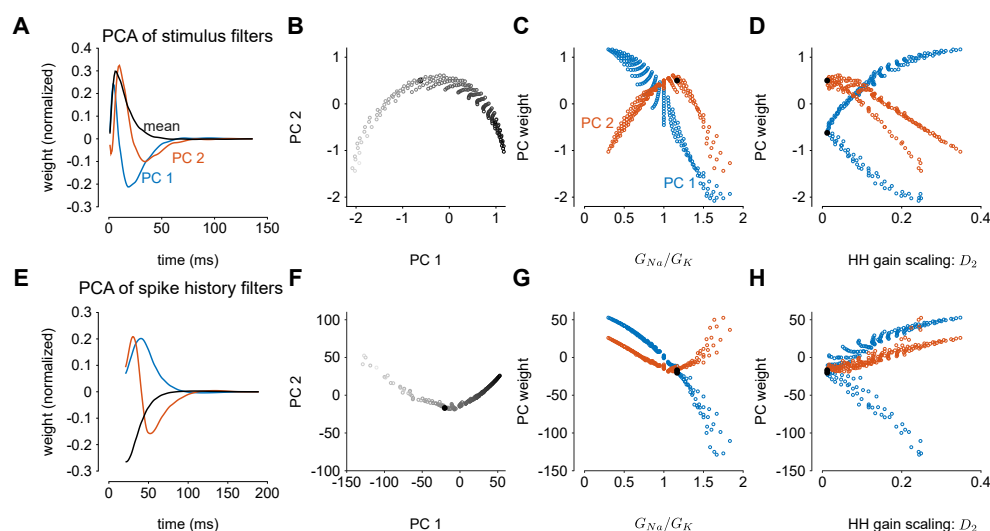

Figure 6: Principal component analysis of the GLM stimulus and spike history filters trained across all values of  $G_{Na}$  and  $G_K$ . The GLMs were trained on all  $\sigma$  values with a spike history length of 150 ms. **(A)** The first two PCs (blue and red) of the stimulus filter. The normalized mean filter is given in black. **(B)** The projections of the stimulus filters onto the first two PCs. The shade of the points corresponds to  $G_{Na}/G_K$  where lighter indicates a higher ratio. The black points in B-C,E-F indicates GLM fit to the HH model with the best gain scaling (i.e., lowest  $D_2$ ). **(C)** The stimulus filter PC weights (same as in B) as a function of the  $G_{Na}/G_K$  ratio. **(D)** The stimulus filter PC weights as a function of the gain scaling factor ( $D_2$ ) observed in the HH simulation fit by the GLM. **(E-F)** Same as A-F for the GLMs' spike history filters. The first 20 ms of the spike history filters were excluded from analysis to avoid effects from the strong refractory period.

235 for HH simulations with low  $G_{Na}/G_K$  ratios (**Figure 7B**). For those ratios, the exponential GLM in fact  
 236 predicted *greater* gain scaling than the HH simulation actually showed (**Figure 5A** and **Supplemen-**  
 237 **tary Figure 2A**). We found the power-law nonlinearities showed *less* gain scaling in the low  $G_{Na}/G_K$   
 238 regime, which was more consistent with the HH simulations (**Figure 7C**). This perhaps counter-intuitive  
 239 result is likely due to the temporal processing of the GLM: the spike history filter shapes the effective  
 240 stimulus-response function over longer timescales. Thus, the instantaneous spike rate function need  
 241 not be a power law to produce gain scaling and an instantaneous power-law function may not result in  
 242 strong gain scaling in the presence of spike history dependencies.

### 243 3.2 GLMs capture fractional differentiation with long timescales of adaptation

244 In this section, we address adaptive computations occurring over multiple timescales spanning tens of  
 245 seconds, instead of instantaneous gain. We consider adaptation to changes in stimulus variance in  
 246 the responses of HH simulations with three AHP currents (Lundstrom et al., 2008). The neurons were  
 247 injected with noise stimuli such with a periodically modulated SD. The stimulus SD followed either a  
 248 sine or square wave. We focused our analyses on the cycle-averaged firing rate to see how the neural

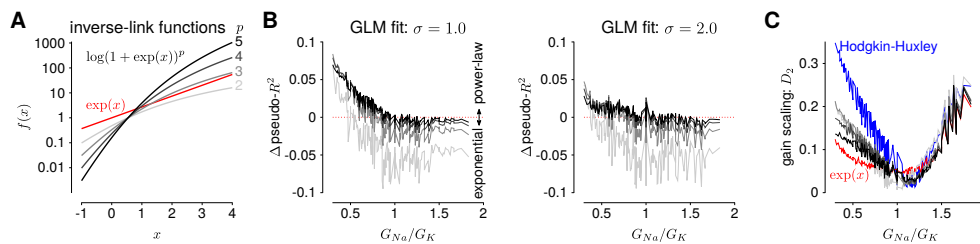

Figure 7: (A) The 5 inverse-link functions tested in the GLM. The red trace shows the canonical exponential inverse-link function used in **Figures 4-5**. The gray traces show the soft-power function for different exponents,  $p$ . (B) The difference in predictive performance (measured as pseudo- $R^2$ ) between the exponential GLMs and the power-law GLMs for  $p \in \{2, 3, 4, 5\}$  for a test stimulus of  $\sigma = 1.0$  (left) and  $\sigma = 2.0$  (right). Positive values indicate the GLM with a power-law nonlinearity had greater predictive performance than the exponential GLM. The GLMs were fit to all  $\sigma$ . (C) Gain scaling predicted by the power-law GLMs (gray traces) compared to the exponential GLMs (red) and the HH simulations (blue).

249 responses reflect fractional differentiation of the stimulus SD envelope in the cycle-averages.

250 We fit GLMs to HH simulations in response to with either sine- or square-wave SD modulation. The  
 251 training data included simulations with noise modulation periods of 1 to 64 s. We considered GLMs with  
 252 different lengths of spike history filters. Cycle-averaged responses of HH and GLM simulations appear  
 253 qualitatively similar (**Figure 8**), and thus we aimed to characterize how well the GLM fits captured the  
 254 fractional differentiation properties of the HH neuron.

255 The sinusoidal noise simulations show two properties of fractional differentiation. First, we estimated  
 256 response gain (i.e., the strength of the sinusoidal modulation in the cycle-averaged response as a  
 257 function of stimulus period; **Figure 9A**). In an ideal fractional differentiator, the log gain is proportional  
 258 to the log of the stimulus period. The HH neuron shows a near linear response ( $r^2 = 0.99$ ,  $p < 10^{-4}$ ).  
 259 Although the GLM with short history shows an almost flat relationship, increasing the spike history  
 260 length shows similar slope to the HH neuron. The second property was the phase lead of the cycle-  
 261 averaged response relative to the stimulus (**Figure 9B**). The phase lead should be constant under  
 262 perfect fractional differentiation. The phase lead declines with longer period, but the HH simulation still  
 263 shows strong phase lead in a 64 s period. Short spike history filter GLMs exhibit a phase lead that tends  
 264 to zero with long SD periods. However, the GLM fit with a long spike history filter closely tracks the HH  
 265 neuron's phase lead.

266 The final signature of fractional differentiation was the exponential decay of the cycle-averaged re-  
 267 sponse under square-wave noise simulation (**Figure 9C**). We estimate the time constant of the decay  
 268 on the square noise cycle average for both steps up and steps down in stimulus SD. The time constant  
 269 increases approximately linearly with the SD period, and GLMs with long spike history showed time  
 270 constants closely approximated the HH neuron.

271 From each signature, we estimated the order of the fractional differentiation ( $\alpha$ ) in both the HH neurons  
 272 and the GLM fits. We estimated the order using the slope of log-period compared to log-gain and  
 273 mean phase lead across all stimulus periods for the sine-wave SD simulations (**Figure 9D-E**). A least-  
 274 squares fit of FD filter of order  $\alpha$  was applied to the square noise stimuli (**Figure 9F**). We considered

275  $\alpha$  for the GLM fits as a function of the spike history length. The order estimates for the HH neuron,  
276 although slightly different for each signature, were approximately  $\alpha = 0.2$ . The GLM's FD order tends  
277 toward that of the HH neuron as the spike history length increases from below. Surprisingly, when we  
278 considered a GLM trained only to a flat noise stimulus (no sine or square modulation; stimulus SD  
279  $\sigma = 1.0$ ) showed similar  $\alpha$  estimates (**Figure 9D-F**, red traces). Thus, the response properties giving  
280 rise to fractional differentiation of the noise envelope could be detected by the GLM even without driving  
281 with long timescale noise modulation.

282 We then considered how the estimated fractional differentiation order depended on the strength of the  
283 SD modulation. We found a slightly higher  $\alpha$  for lower stimulus SDs. (note that  $\sigma = 2.0$  was used to fit  
284 the GLMs) for the gain and timescale estimates (**Figure 9G-I**). However, the phase lead estimate was  
285 fairly stable across SDs.

286 Next, we quantified how well the GLM predicted the HH responses to new stimuli. Long timescale spike  
287 history filters improved the GLM's ability to predict spike trains, and the improvement continued for spike  
288 histories of several seconds (**Figure 10A**). However, training only on unmodulated noise did not result  
289 in a good GLM fit despite predicting  $\alpha$  (**Figure 10A**).

290 We examined the parameter estimates in the GLM as a function of spike history length. We plotted  
291 the integral of the spike history filter to show how the filter integrates spikes over time. The integrals  
292 show long timescales seen for the GLM fit to either sine- or square- wave noise (**Figure 10B**). The  
293 GLM fit to either type of noise predicted over 60% of the variance in the HH responses to both sine-  
294 and square-wave noise. The flat noise GLM also showed long timescales, but the integral changed  
295 substantially with the spike history length changes. This indicates that the combination of spike-history  
296 dependent timescales is not well-constrained in the flat noise condition despite predicting  $\alpha$ , perhaps  
297 due to biases present in the data without modulations (Stevenson, 2018). The stimulus filters are short  
298 timescale and showed little dependence on spike history length (**Figure 10C**). Thus, the GLM captured  
299 fractional differentiation in the HH neuron by linearizing the long timescale AHP currents.

## 300 4 Discussion

301 Individual neurons can adapt their responses to changes in input statistics. Here, we studied two  
302 adaptive computations to changes in the stimulus variance that are captured by biophysically realistic  
303 neurons. First, we examined gain scaling of the inputs so that the spike-triggered stimulus distribution  
304 was independent of the stimulus variance. The ability of the neuron to gain scale depended on the  
305 ratio of the spike-generating potassium and sodium conductances. Second, we considered spiking  
306 responses that approximate a fractional derivative of the stimulus standard deviation, which can be  
307 produced by a set of AHP currents with different timescales. Although HH neurons can produce these  
308 adaptive effects, it is difficult to fit the HH to data.

309 Our results demonstrate that the GLM provides a tractable statistical framework for modeling adaptation  
310 to stimulus variance in single-neurons. The GLM provides an alternative representation of the spiking  
311 responses as two linear filters (stimulus and spike history filters) with a fixed spiking nonlinearity instead  
312 of a multidimensional (and potentially stochastic) dynamical system (Meng et al., 2011, 2014). Import-  
313 tantly, a single GLM could accurately approximate the responses of HH neurons across multiple levels  
314 of input variance or across multiple timescales of variance modulation. The GLM accomplished this

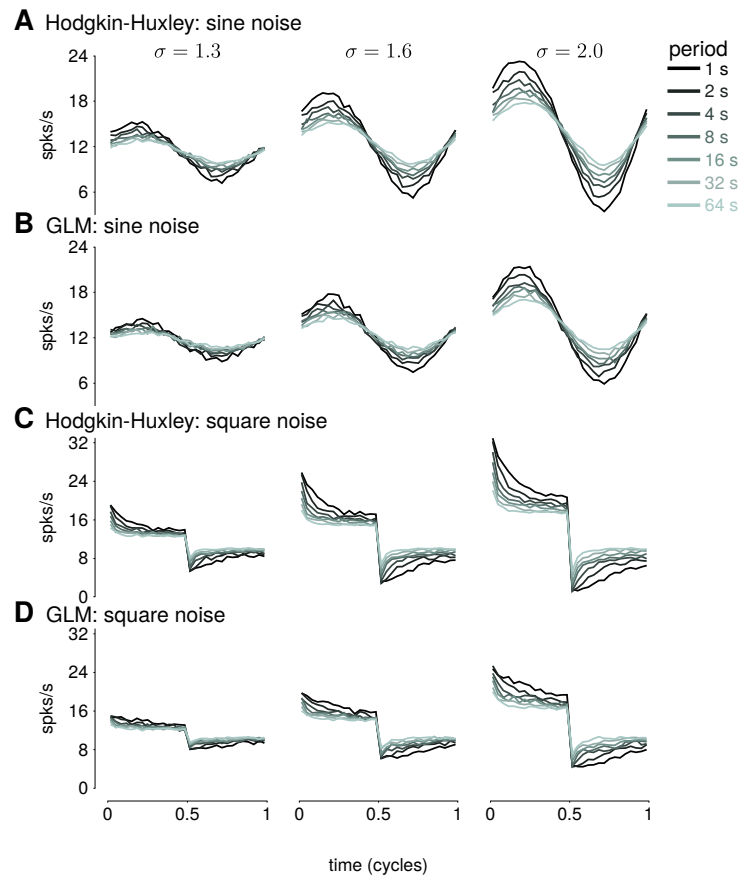

Figure 8: **(A)** The cycle-averaged response of the simulated Hodgkin-Huxley neurons with three AHP currents to sine wave modulated noise. Each trace shows the average response for a different period of noise modulation. The columns show the responses to different strengths of stimulus noise modulation ( $\sigma$ ). **(B)** The cycle-averaged response of a GLM fit to the HH simulations in A. The GLM used a 16 s spike history filter. **(C)** The cycle-averaged response of the HH neurons to square-wave modulated noise. **(D)** The cycle-averaged response of a GLM fit to the HH simulations in C. The cycle averages can be compared to the exact fractional derivatives in **Figure 2B,D**.

315 by linearizing the effect of recent spiking into a nonlinear and stochastic spiking mechanism to adjust  
 316 for the current stimulus statistics. To reproduce gain scaling, only around 150 ms of spike history is  
 317 required, in line with the rapid expression of the gain scaling property with changes in stimulus statistics  
 318 (Fairhall et al., 2001a; Mease et al., 2013). In the fractional derivative case, the GLM summarized the  
 319 multiple AHP currents of the HH models as a single linear autoregressive function with long timescale  
 320 effects.

321 The simulations explored here assumed the input to a cell was an injected current generated from  
 322 a Gaussian distribution. However, neurons receive input as excitatory and inhibitory conductances,  
 323 which can be integrated across complex dendritic processes. Additionally, realistic input statistics may  
 324 not follow a Gaussian distribution. Further work towards understanding the adaptive computations

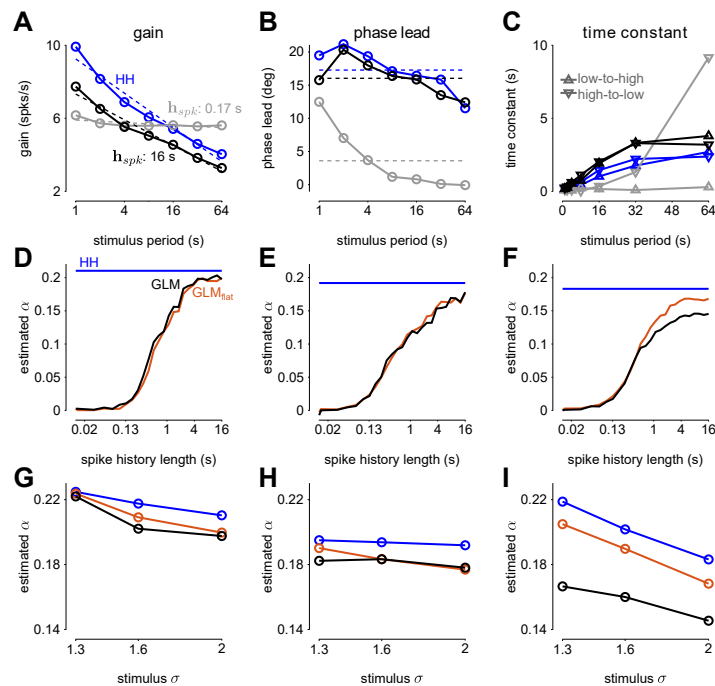

Figure 9: (A) The gain of the average responses to sine-wave modulated noise as a function of stimulus period for the HH and GLMs (Figure 8A-B right). The GLM fit with a 0.17 s spike history filter (gray) is compared to the GLM with the full 16 s spike history (black). The HH simulation is given in blue. The noise stimulus was modulated with  $\sigma = 2$ . (B) The phase lead of the average responses to sine-wave modulated noise as a function of stimulus period for the HH and GLMs. The fraction of variance explained in the HH phase lead curve by the GLM with 16 s spike history was  $R^2 = 0.61$ . (C) The time constant of an exponential function fit to the cycle-averaged response to square wave noise for each stimulus period (Figure 8C-D right). The markers denote time constants estimated for steps from low to high variance or step from high  $v$  to low. The fraction of variance explained of the log time constants of the HH simulation by the GLM with 16 s spike history was  $R^2 = 0.80$ . (D) The fractional differentiation order ( $\alpha$ ) of the GLM estimated by the slope of gain as a function of the log stimulus period in B. The value is estimated for each spike history lengths (black) and compared to  $\alpha$  estimated from the HH simulation (blue). The red trace shows  $\alpha$  estimated from the GLM fit only to unmodulated noise. (E)  $\alpha$  estimated by the average phase lead across stimulus periods. (F)  $\alpha$  estimated by fitting a the square-wave responses with a fractional differentiating filter. (G-I)  $\alpha$  estimated at different noise modulation strengths for the 16 s spike history GLM and HH simulation.

325 performed by single neurons should consider the inputs the neuron receives within a broader network.  
 326 Neural coding and computations that occur across a wide range of input levels depend heavily on  
 327 adaption to the stimulus variance (Wark et al., 2007). The GLM, despite being a simple approximation,  
 328 can provide a good representation of adaptive computations in biophysically realistic neurons.



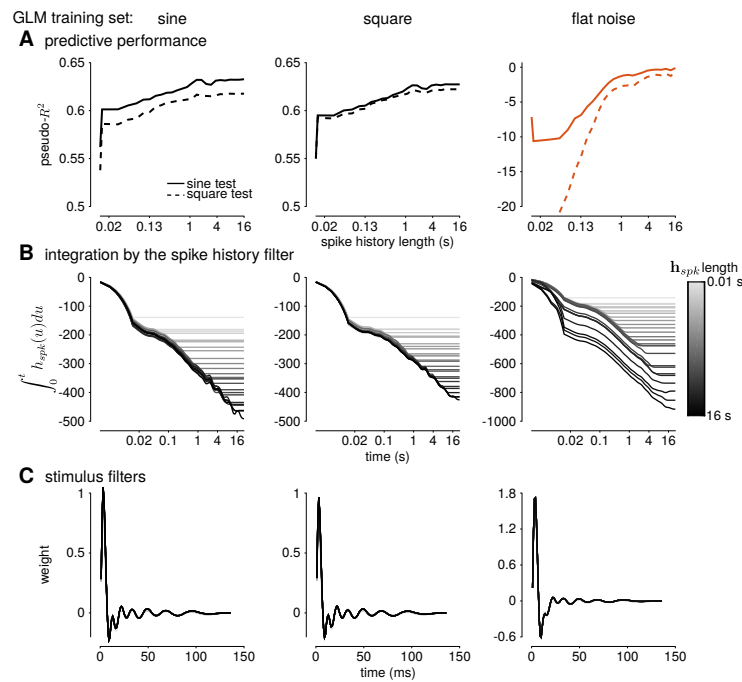

Figure 10: Assessing the model fitness for GLMs fit to sine wave modulated noise (left), square wave noise (middle), and unmodulated noise (right). **(A)** The pseudo- $R^2$  measured on a withheld training set simulated from the HH model as a function of spike history length. The stimulus was sine (solid lines) or square (dashed lines) modulated noise with a 4 s period and a modulation strength of  $\sigma = 2$ . **(B)** The integral over time (i.e., cumulative sums) of each spike history filter. **(C)** The stimulus filters for all GLM fits.

## 329 Conflict of Interest Statement

330 The authors declare that the research was conducted in the absence of any commercial or financial  
331 relationships that could be construed as a potential conflict of interest.

## 332 Author Contributions

333 KL and AF designed the study. KL performed the simulations and statistical analysis. KL and AF wrote  
334 the the manuscript.

## 335 Funding

336 This work was supported by the Human Frontiers in Science Program to ALF. KWL was supported by  
337 a Chicago Fellowship.

## 338 **Acknowledgments**

339 We thank Jonathan Pillow and Misha Proskurin for their help in developing this project.

## 340 **Data Availability Statement**

341 All simulations are publicly available at <https://github.com/latimerk/GainScalingGLM>.

## 342 **References**

- 343 Agüera y Arcas, B. and Fairhall, A. L. (2003). What causes a neuron to spike? *Neural Computation* 15,  
344 1789–1807
- 345 Agüera y Arcas, B., Fairhall, A. L., and Bialek, W. (2003). Computation in a single neuron: Hodgkin and  
346 huxley revisited. *Neural Computation* 15, 1715–1749
- 347 Anastasio, T. J. (1998). Nonuniformity in the linear network model of the oculomotor integrator produces  
348 approximately fractional-order dynamics and more realistic neuron behavior. *Biological Cybernetics*  
349 79, 377–391
- 350 Benjamin, A. S., Fernandes, H. L., Tomlinson, T., Ramkumar, P., VerSteeg, C., Chowdhury, R. H.,  
351 et al. (2018). Modern machine learning as a benchmark for fitting neural responses. *Frontiers in*  
352 *Computational Neuroscience* 12
- 353 Buhry, L., Grassia, F., Giremus, A., Grivel, E., Renaud, S., and Saïghi, S. (2011). Automated param-  
354 eter estimation of the hodgkin-huxley model using the differential evolution algorithm: application to  
355 neuromimetic analog integrated circuits. *Neural Computation* 23, 2599–2625
- 356 Cameron, A. C. and Windmeijer, F. A. (1997). An r-squared measure of goodness of fit for some  
357 common nonlinear regression models. *Journal of Econometrics* 77, 329–342
- 358 Csercsik, D., Hangos, K. M., and Szederkényi, G. (2012). Identifiability analysis and parameter estima-  
359 tion of a single hodgkin–huxley type voltage dependent ion channel under voltage step measurement  
360 conditions. *Neurocomputing* 77, 178–188
- 361 Fairhall, A. (2014). Adaptation and natural stimulus statistics. In *The Cognitive Neurosciences*, eds.  
362 G. M. S and M. G. R (MIT Press), chap. 26. 283–293
- 363 Fairhall, A. L., Lewen, G. D., Bialek, W., and de Ruyter van Steveninck, R. R. (2001a). Efficiency and  
364 ambiguity in an adaptive neural code. *Nature* 412, 787
- 365 Fairhall, A. L., Lewen, G. D., Bialek, W., and de Ruyter van Steveninck, R. R. (2001b). Multiple  
366 timescales of adaptation in a neural code. In *Advances in Neural Information Processing Systems*.  
367 124–130
- 368 Lankarany, M., Zhu, W.-P., and Swamy, M. (2014). Joint estimation of states and parameters of  
369 hodgkin–huxley neuronal model using kalman filtering. *Neurocomputing* 136, 289–299
- 370 Lundstrom, B. N., Higgs, M. H., Spain, W. J., and Fairhall, A. L. (2008). Fractional differentiation by  
371 neocortical pyramidal neurons. *Nature Neuroscience* 11, 1335
- 372 Mainen, Z. F., Joerges, J., Huguenard, J. R., and Sejnowski, T. J. (1995). A model of spike initiation in  
373 neocortical pyramidal neurons. *Neuron* 15, 1427–1439
- 374 McCullagh, P. and Nelder, J. A. (1989). *Generalized Linear Models*, vol. 37 of *Monographs on Statistics*  
375 *and Applied Probability* (Chapman & Hall/CRC), second edn.

- 376 Mease, R. A., Famulare, M., Gjorgjieva, J., Moody, W. J., and Fairhall, A. L. (2013). Emergence of adap-  
377 tive computation by single neurons in the developing cortex. *Journal of Neuroscience* 33, 12154–  
378 12170
- 379 Mease, R. A., Lee, S., Moritz, A. T., Powers, R. K., Binder, M. D., and Fairhall, A. L. (2014). Context-  
380 dependent coding in single neurons. *Journal of Computational Neuroscience* 37, 459–480
- 381 Meng, L., Kramer, M. A., and Eden, U. T. (2011). A sequential monte carlo approach to estimate  
382 biophysical neural models from spikes. *Journal of Neural Engineering* 8, 065006
- 383 Meng, L., Kramer, M. A., Middleton, S. J., Whittington, M. A., and Eden, U. T. (2014). A unified approach  
384 to linking experimental, statistical and computational analysis of spike train data. *PLoS One* 9, e85269
- 385 Miller, K. D. and Troyer, T. W. (2002). Neural noise can explain expansive, power-law nonlinearities in  
386 neural response functions. *Journal of Neurophysiology* 87, 653–659. doi:10.1152/jn.00425.2001.  
387 PMID: 11826034
- 388 Murphy, B. K. and Miller, K. D. (2003). Multiplicative gain changes are induced by excitation or inhibition  
389 alone. *Journal of Neuroscience* 23, 10040–10051. doi:10.1523/JNEUROSCI.23-31-10040.2003
- 390 Oldham, K. and Spanier, J. (1974). *The fractional calculus theory and applications of differentiation and*  
391 *integration to arbitrary order*, vol. 111 (Elsevier)
- 392 Pillow, J. W., Shlens, J., Paninski, L., Sher, A., Litke, A. M., Chichilnisky, E., et al. (2008). Spatio-  
393 temporal correlations and visual signalling in a complete neuronal population. *Nature* 454, 995
- 394 Pozzorini, C., Naud, R., Mensi, S., and Gerstner, W. (2013). Temporal whitening by power-law adapta-  
395 tion in neocortical neurons. *Nature Neuroscience* 16, 942–948
- 396 Rieke, F., Warland, D., de Ruyter van Steveninck, R., and Bialek, W. (1999). *Spikes: Exploring the*  
397 *Neural Code* (MIT Press)
- 398 Stevenson, I. H. (2018). Omitted variable bias in glms of neural spiking activity. *Neural Computation*  
399 30, 3227–3258
- 400 Truccolo, W., Eden, U. T., Fellows, M. R., Donoghue, J. P., and Brown, E. N. (2005). A point pro-  
401 cess framework for relating neural spiking activity to spiking history, neural ensemble, and extrinsic  
402 covariate effects. *Journal of Neurophysiology* 93, 1074–1089
- 403 Vavoulis, D. V., Straub, V. A., Aston, J. A., and Feng, J. (2012). A self-organizing state-space-model  
404 approach for parameter estimation in hodgkin-huxley-type models of single neurons. *PLoS Compu-*  
405 *tational Biology* 8, e1002401
- 406 Wark, B., Lundstrom, B. N., and Fairhall, A. (2007). Sensory adaptation. *Current Opinion in Neurobiol-*  
407 *ogy* 17, 423–429
- 408 Weber, A. I. and Pillow, J. W. (2017). Capturing the dynamical repertoire of single neurons with gener-  
409 alized linear models. *Neural Computation* 29, 3260–3289

410 **Supplementary Information**

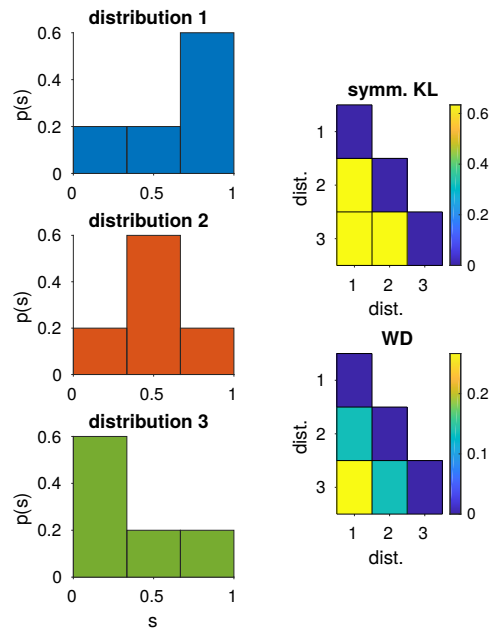

Supplementary Figure 1: Example differences between the Kullback-Leibler (KL) divergence with the Wasserstein distance used to measure gain scaling. The difference in the three distributions is probability mass moved along the axis. (Left) Three example distributions over the value  $s$  are given. (Right) The (symmetrized) KL divergence between each of the three distributions and the Wasserstein distances. The Wasserstein metric depends on the distance the peak of probability mass is moved along the axis: the distance between distributions 1 and 3 is greater than between distributions 1 and 2. In contrast, the KL divergence does not depend on the distance and the divergence between each pair of distributions is equal.

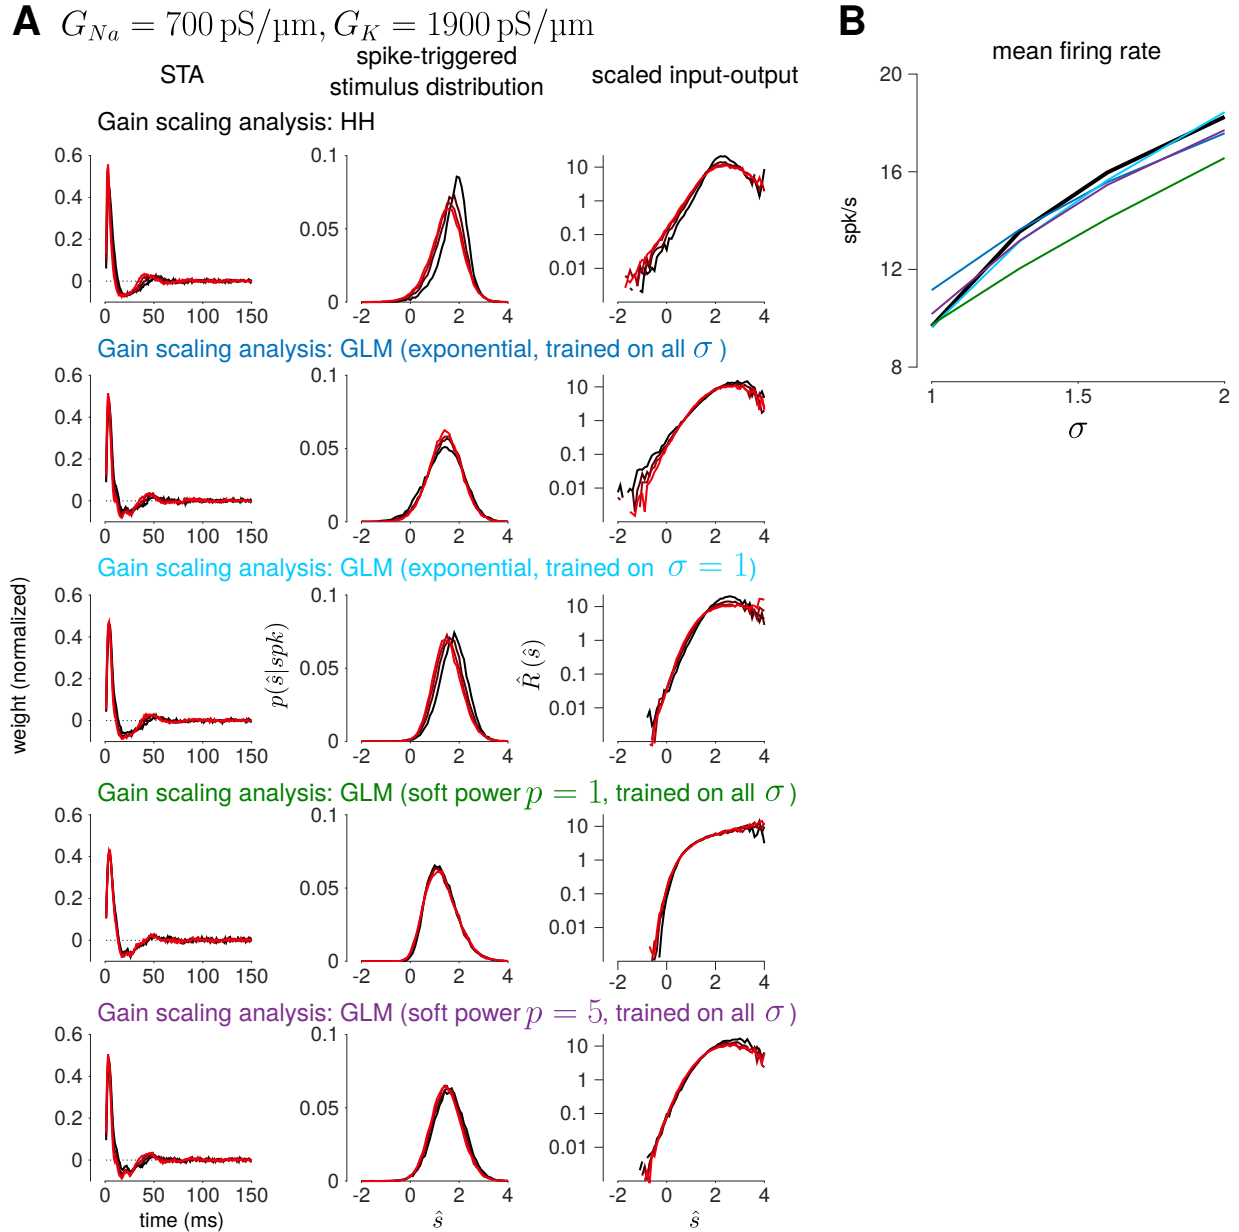

Supplementary Figure 2: **(A)** Example gain scaling analysis for four different GLM fits to the HH simulation in the top row. The HH simulation has a low sodium to potassium ratio with poor gain scaling. **(B)** The firing rates of the HH and GLM simulations as a function of  $\sigma$ .

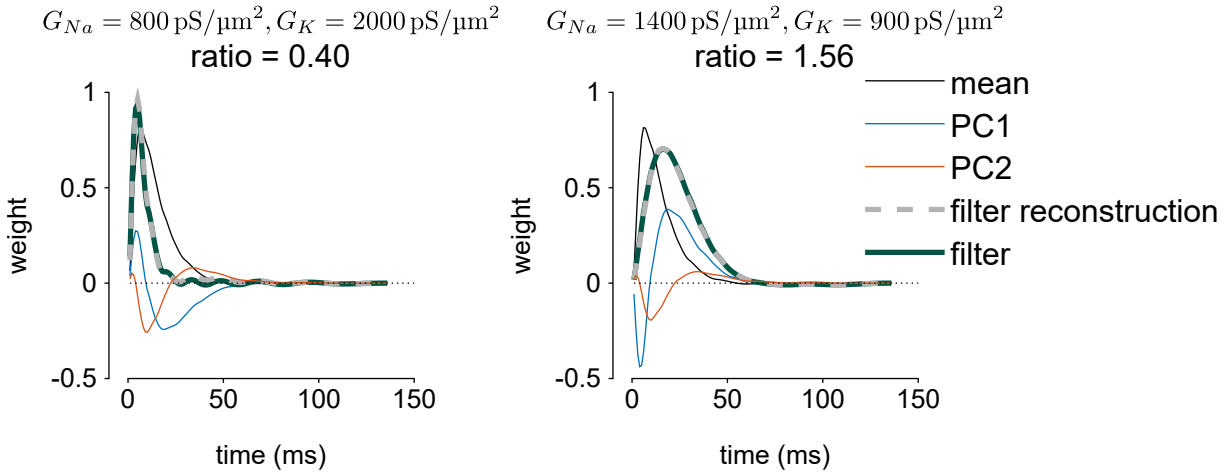

Supplementary Figure 3: Example PCA reconstruction of the GLM's stimulus filter for two of the HH fits. The mean filter and the two weighted PC vectors are given. The filter is reconstructed from the 2-D PCA space as the sum of the mean and the two PCs (dashed gray trace), and the reconstruction can be compared to the GLM filter (dark teal trace). Adding the weighted combinations of the two PCs extends or shortens the mean filter instead of adding multiple modes.
